# Supplementary material for: Testosterone Increases the Emission of Ultrasonic Vocalizations With Different Acoustic Characteristics in Mice
Source: PubMed Central journal article supplement (PMC8267093; doi:10.3389/fpsyg.2021.680176), 2021-06-25
Supplement: Data_Sheet_1.pdf [file Data_Sheet_1.pdf]

## *Supplementary Material*

### 1 Supplementary Figures and Tables

#### Supplementary Table S1.

**Table S1. Definition of acoustic characters of USVs**

| Parameters          | Definition                                                                                                                                                                                                                      |
|---------------------|---------------------------------------------------------------------------------------------------------------------------------------------------------------------------------------------------------------------------------|
| duration(ms):       | Duration of each call, in millisecond.                                                                                                                                                                                          |
| freq dynamic(Hz)    | Difference between the maximum and the minimum peak frequency of call.                                                                                                                                                          |
| delta_Freq          | Difference between end Frequency and start Frequency                                                                                                                                                                            |
| meanFrequency(Hz)   | Mean of the peak frequencies over each timepoint in each call                                                                                                                                                                   |
| FrequencyTV(Hz)     | Total variation of the peak frequency for each t (sum of the absolute values of the difference between consecutive peak frequencies).                                                                                           |
| meanFrequencyTV(Hz) | FrequencyTVHz divided by the number of points in the USV.                                                                                                                                                                       |
| linearity index     | Sum of the euclidean distance to the linear regression divided by the number of points in the USV.                                                                                                                              |
| nb modulation       | Number of times where the signal gets over and below the linear regression of the signal. Note that the signal should overtake linear regression by 876Hz (which corresponds to 3 times the frequency accuracy of the 1024 FFT) |
| nb jumps            | The number of jumps is computed if the frequency dynamic of the USV is over 10 kHz. Then if the frequency changes from one t to the next over than $\frac{1}{3}$ of the frequency dynamic, we set one jump.                     |
| minFrequency(Hz)    | Minimum peak frequency                                                                                                                                                                                                          |
| maxFrequency(Hz)    | Maximum peak frequency                                                                                                                                                                                                          |
| peak Frequency(Hz)  | Peak frequency (highest) in each call                                                                                                                                                                                           |

(cited from Ey. et al. 2021)

## Supplementary Table S2

**Table S2. Factor Loadings of 13 acoustic parameters on 3 Clusters**

| Parameters          | Cluster1 | Cluster2 | Cluster3 |
|---------------------|----------|----------|----------|
| meanFrequencyTV(Hz) | 0.467    |          |          |
| freq dynamic(Hz)    | 0.465    |          |          |
| linearity index     | 0.438    |          |          |
| frequencyTV(Hz)     | 0.437    |          |          |
| nb jumps            | 0.427    |          |          |
| meanFrequency(Hz)   |          | 0.514    |          |
| peak Frequency(Hz)  |          | 0.511    |          |
| maxFrequency(Hz)    |          | 0.489    |          |
| minFrequency(Hz)    |          | 0.486    |          |
| nb modulation       |          |          | 0.559    |
| duration(ms):       |          |          | 0.554    |
| voc number          |          |          | 0.514    |
| delta_Freq          |          |          | -0.342   |

## Supplementary Table S3

**Table S3. Cluster scores of each group**

|          | Control |                     |          |                    | TP       |                    |          |                     |
|----------|---------|---------------------|----------|--------------------|----------|--------------------|----------|---------------------|
|          | Female  |                     | Male     |                    | Female   |                    | Male     |                     |
| Cluster1 | 0.646 ± | 0.035               | -0.037 ± | 0.017              | -0.005 ± | 0.016              | -0.370 ± | 0.014               |
| Cluster2 | 0.053 ± | 0.021 <sup>ac</sup> | -0.906 ± | 0.013 <sup>a</sup> | 0.375 ±  | 0.013 <sup>b</sup> | 0.826 ±  | 0.016 <sup>bc</sup> |
| Cluster3 | 0.258 ± | 0.019               | 0.101 ±  | 0.013              | -0.081 ± | 0.011              | -0.202 ± | 0.011               |

values are mean ± sem

Different alphabet letters (ex. a and b) show statistical difference. Kruskal-Warris test, followed by Steel-Dwass test.

## Supplementary Table S4

**Table S4-1. Acoustic characters of 9 clusters of call types: MeanValues**

|                     | 1      | 2     | 3      | 4     | 5     | 6      | 7      | 8     | 9      |
|---------------------|--------|-------|--------|-------|-------|--------|--------|-------|--------|
| duration(ms):       | 79.32  | 46.43 | 67.33  | 89.76 | 38.37 | 78.71  | 73.16  | 36.15 | 139.94 |
| freq dynamic(Hz)    | 33654  | 11314 | 37535  | 11624 | 5921  | 47080  | 39210  | 5443  | 45527  |
| delta_Freq          | -1537  | 2950  | -28728 | -3048 | 3288  | -6625  | 7067   | 2159  | -7580  |
| meanFrequency(Hz)   | 60531  | 70407 | 62009  | 60185 | 61143 | 63856  | 61161  | 48729 | 58355  |
| FrequencyTV(Hz)     | 142721 | 19939 | 77051  | 27651 | 10264 | 298604 | 120967 | 9099  | 319812 |
| meanFrequencyTV(Hz) | 1667.3 | 370.1 | 1062.3 | 275.0 | 225.2 | 3302.5 | 1518.8 | 208.7 | 2099.9 |
| linearity index     | 17.411 | 5.587 | 17.739 | 6.236 | 2.532 | 25.094 | 21.179 | 2.611 | 26.217 |
| nb modulation       | 3.071  | 1.743 | 1.664  | 2.551 | 1.234 | 2.120  | 1.661  | 0.979 | 8.123  |
| nb jumps            | 5.176  | 0.115 | 0.357  | 0.115 | 0.017 | 0.231  | 0.584  | 0.036 | 0.311  |
| minFrequency(Hz)    | 45080  | 64716 | 44487  | 54588 | 57903 | 39676  | 41310  | 45867 | 36923  |
| maxFrequency(Hz)    | 78735  | 76030 | 82022  | 66212 | 63824 | 86755  | 80520  | 51311 | 82450  |
| peak Frequency(Hz)  | 60107  | 71185 | 61382  | 61773 | 61986 | 64275  | 62058  | 49077 | 57417  |

**Table S4-2. Acoustic characters of 9 clusters of call types: Standard deviation**

|                     | 1        | 2        | 3        | 4        | 5        | 6        | 7        | 8        | 9        |
|---------------------|----------|----------|----------|----------|----------|----------|----------|----------|----------|
| duration(ms):       | 34.66679 | 16.58666 | 25.70891 | 29.83539 | 13.777   | 18.80476 | 27.22923 | 19.01855 | 45.70292 |
| freq dynamic(Hz)    | 8452.288 | 6719.612 | 9889.423 | 5145.226 | 3404.143 | 5893.949 | 6661.878 | 4170.336 | 8306.492 |
| delta_Freq          | 12661.09 | 9318.883 | 9766.336 | 6864.363 | 4607.201 | 17715.22 | 13560.33 | 4885.214 | 12795.09 |
| meanFrequency(Hz)   | 7031.541 | 5761.734 | 7113.996 | 3889.582 | 2916.086 | 6119.934 | 7130.845 | 7234.677 | 5644.81  |
| FrequencyTV(Hz)     | 69603.59 | 12332.31 | 49382.91 | 12238.9  | 5148.771 | 85729.58 | 52059.53 | 7433.232 | 126314.9 |
| meanFrequencyTV(Hz) | 834.798  | 220.19   | 614.8692 | 114.8626 | 92.72811 | 842.8254 | 608.711  | 130.6515 | 842.4457 |
| linearity index     | 6.567797 | 4.126065 | 8.30385  | 2.976599 | 1.729604 | 4.593016 | 5.653118 | 2.637074 | 7.486638 |
| nb modulation       | 2.127561 | 0.910041 | 1.221077 | 0.795689 | 0.955144 | 1.63843  | 1.473947 | 1.013357 | 2.862466 |
| nb jumps            | 2.141024 | 0.383604 | 0.610441 | 0.391074 | 0.140692 | 0.570403 | 0.818614 | 0.213116 | 0.691994 |
| minFrequency(Hz)    | 6856.405 | 6387.282 | 11165.91 | 4624.67  | 3533.707 | 4046.008 | 7040.535 | 6642.226 | 4449.251 |
| maxFrequency(Hz)    | 7690.025 | 7167.466 | 9890.56  | 5416.018 | 3408.948 | 6567.513 | 9005.355 | 8125.069 | 9035.545 |
| peak Frequency(Hz)  | 12125.19 | 6460.679 | 11554.74 | 4407.235 | 3060.018 | 16818.18 | 12072.44 | 7635.688 | 12479.46 |

## Supplementary Table S5

Table S5. Probability (%) of transition of call types in each group

| Vertex 1 | Vertex 2 | Control |       | TP     |       |
|----------|----------|---------|-------|--------|-------|
|          |          | Female  | Male  | Female | Male  |
| 1        | 1        | 0.00    | 0.00  | 0.00   | 0.00  |
| 1        | 2        | 0.00    | 0.00  | 0.00   | 0.00  |
| 1        | 3        | 0.00    | 0.00  | 0.00   | 0.00  |
| 1        | 4        | 0.00    | 0.00  | 0.00   | 0.00  |
| 1        | 5        | 0.00    | 0.00  | 0.00   | 0.00  |
| 1        | 6        | 0.00    | 0.00  | 0.00   | 0.00  |
| 1        | 7        | 0.00    | 0.00  | 0.00   | 0.00  |
| 1        | 8        | 0.00    | 0.00  | 0.00   | 0.00  |
| 1        | 9        | 0.00    | 0.00  | 0.00   | 0.00  |
| 2        | 1        | 0.00    | 0.00  | 0.00   | 0.00  |
| 2        | 2        | 4.57    | 12.89 | 3.54   | 10.69 |
| 2        | 3        | 0.00    | 0.00  | 0.00   | 0.00  |
| 2        | 4        | 0.00    | 0.00  | 0.00   | 0.00  |
| 2        | 5        | 5.27    | 7.93  | 4.16   | 12.40 |
| 2        | 6        | 0.00    | 0.00  | 0.00   | 0.00  |
| 2        | 7        | 0.00    | 0.29  | 0.40   | 0.17  |
| 2        | 8        | 2.62    | 9.20  | 2.74   | 12.15 |
| 2        | 9        | 0.00    | 0.00  | 0.00   | 0.00  |
| 3        | 1        | 0.00    | 0.00  | 0.00   | 0.00  |
| 3        | 2        | 0.00    | 0.00  | 0.00   | 0.00  |
| 3        | 3        | 0.00    | 0.00  | 0.00   | 0.00  |
| 3        | 4        | 0.00    | 0.00  | 0.00   | 0.00  |
| 3        | 5        | 0.49    | 0.31  | 0.59   | 0.27  |
| 3        | 6        | 0.00    | 0.00  | 0.00   | 0.00  |
| 3        | 7        | 0.00    | 0.00  | 0.00   | 0.00  |
| 3        | 8        | 0.00    | 0.00  | 0.00   | 0.00  |
| 3        | 9        | 0.00    | 0.00  | 0.00   | 0.00  |
| 4        | 1        | 0.00    | 0.00  | 0.00   | 0.00  |
| 4        | 2        | 0.38    | 0.28  | 0.42   | 0.18  |
| 4        | 3        | 0.00    | 0.00  | 0.00   | 0.00  |
| 4        | 4        | 1.15    | 1.41  | 1.55   | 0.76  |
| 4        | 5        | 2.88    | 3.45  | 4.28   | 1.88  |
| 4        | 6        | 0.00    | 0.00  | 0.00   | 0.00  |
| 4        | 7        | 0.36    | 0.51  | 0.45   | 0.26  |
| 4        | 8        | 0.00    | 0.00  | 0.00   | 0.00  |
| 4        | 9        | 0.00    | 0.00  | 0.00   | 0.00  |
| 5        | 1        | 0.00    | 0.00  | 0.00   | 0.00  |
| 5        | 2        | 19.97   | 7.28  | 5.33   | 12.36 |
| 5        | 3        | 0.51    | 0.00  | 0.35   | 0.22  |
| 5        | 4        | 3.19    | 3.85  | 4.57   | 2.10  |
| 5        | 5        | 52.80   | 40.66 | 54.55  | 40.74 |
| 5        | 6        | 0.00    | 0.27  | 0.28   | 0.00  |
| 5        | 7        | 0.68    | 1.00  | 1.21   | 0.48  |
| 5        | 8        | 1.65    | 1.29  | 1.77   | 0.68  |
| 5        | 9        | 0.00    | 0.00  | 0.26   | 0.00  |

| Vertex 1 | Vertex 2 | Control |      | TP     |      |
|----------|----------|---------|------|--------|------|
|          |          | Female  | Male | Female | Male |
| 6        | 1        | 0.00    | 0.00 | 0.00   | 0.00 |
| 6        | 2        | 0.00    | 0.00 | 0.00   | 0.00 |
| 6        | 3        | 0.00    | 0.00 | 0.00   | 0.00 |
| 6        | 4        | 0.00    | 0.00 | 0.00   | 0.00 |
| 6        | 5        | 0.00    | 0.31 | 0.30   | 0.14 |
| 6        | 6        | 0.00    | 0.43 | 0.41   | 0.19 |
| 6        | 7        | 0.00    | 0.00 | 0.00   | 0.00 |
| 6        | 8        | 0.00    | 0.00 | 0.00   | 0.00 |
| 6        | 9        | 0.00    | 0.00 | 0.00   | 0.00 |
| 7        | 1        | 0.00    | 0.00 | 0.00   | 0.00 |
| 7        | 2        | 0.00    | 0.00 | 0.00   | 0.00 |
| 7        | 3        | 0.00    | 0.00 | 0.00   | 0.00 |
| 7        | 4        | 0.40    | 0.51 | 0.69   | 0.25 |
| 7        | 5        | 0.75    | 1.08 | 1.27   | 0.55 |
| 7        | 6        | 0.00    | 0.27 | 0.28   | 0.14 |
| 7        | 7        | 0.00    | 0.62 | 0.77   | 0.30 |
| 7        | 8        | 0.00    | 0.00 | 0.00   | 0.00 |
| 7        | 9        | 0.00    | 0.00 | 0.00   | 0.00 |
| 8        | 1        | 0.00    | 0.00 | 0.00   | 0.00 |
| 8        | 2        | 0.00    | 0.81 | 2.42   | 1.03 |
| 8        | 3        | 0.00    | 0.00 | 0.00   | 0.00 |
| 8        | 4        | 0.00    | 0.00 | 0.00   | 0.00 |
| 8        | 5        | 1.76    | 2.79 | 2.37   | 0.69 |
| 8        | 6        | 0.00    | 0.00 | 0.00   | 0.00 |
| 8        | 7        | 0.00    | 0.00 | 0.00   | 0.00 |
| 8        | 8        | 0.58    | 2.55 | 4.79   | 1.26 |
| 8        | 9        | 0.00    | 0.00 | 0.00   | 0.00 |
| 9        | 1        | 0.00    | 0.00 | 0.00   | 0.00 |
| 9        | 2        | 0.00    | 0.00 | 0.00   | 0.00 |
| 9        | 3        | 0.00    | 0.00 | 0.00   | 0.00 |
| 9        | 4        | 0.00    | 0.00 | 0.00   | 0.00 |
| 9        | 5        | 0.00    | 0.00 | 0.27   | 0.13 |
| 9        | 6        | 0.00    | 0.00 | 0.00   | 0.00 |
| 9        | 7        | 0.00    | 0.00 | 0.00   | 0.00 |
| 9        | 8        | 0.00    | 0.00 | 0.00   | 0.00 |
| 9        | 9        | 0.00    | 0.00 | 0.00   | 0.00 |

Values are mean of % of occurrence of transition

Supplementary Figure S1

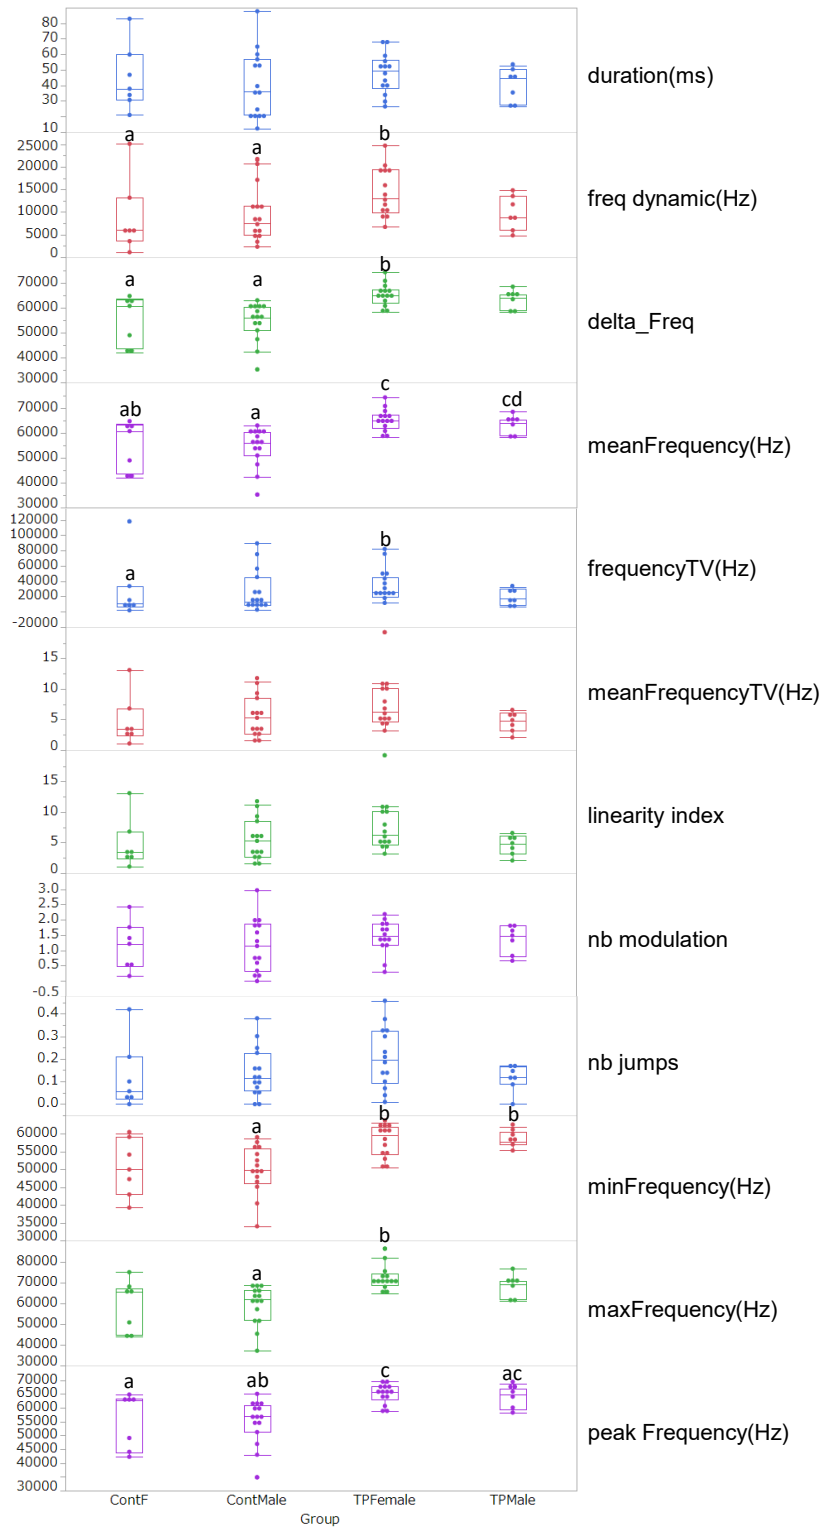

**Supplementary Figure 1.** Twelve acoustic parameters were compared among the 4 groups. Different letter alphabet letters (e.g., a and b) mean that there was a statistically significant difference between the two groups obtained using the Kruskal-Wallis test followed by the Steel-Dwass test.

## Supplementary Figure S2

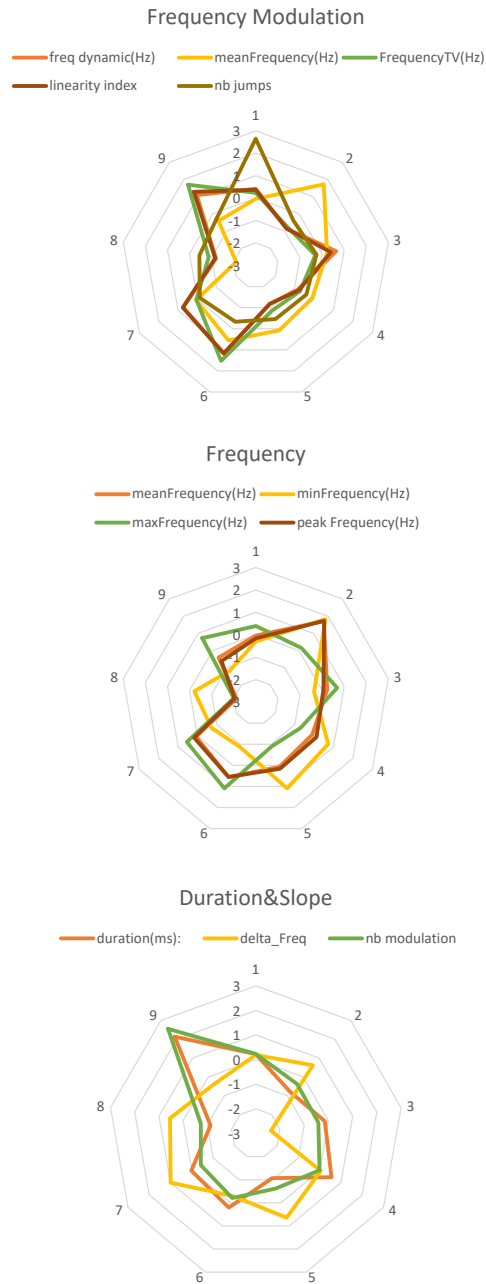

**Supplementary Figure 2.** Acoustic characteristics of the 9 call types. The acoustic parameters were grouped in 3, according to the clustering result (Figure 1), and each call types (1 to 9) were plotted in the radar charts (z scores).
